# Supplementary material for: Narcolepsy and psychosis: A systematic review
Source: PubMed Central journal article supplement — Acta Psychiatr Scand. 2021 May 5;144(1):28–41. doi: 10.1111/acps.13300 (PMC8360149; doi:10.1111/acps.13300), 2021-05-05
Supplement: ACPS-144-28-s001.pdf [file ACPS-144-28-s001.pdf]

**Supplementary Table 1. Sleep and psychotic symptoms and clinical characteristics in published case reports of narcolepsy with psychotic-like symptoms or comorbid psychotic disorders**

| First Author | Year | Case | AAO sleep symptoms | Sleep Symptoms                       | AAO psychotic | Meds prior to psychosis | Psychotic symptoms                                           | DQB1* 06:02 / CSF | Diagnosis        | Criteria     | Group | Other medical condition (s)            |
|--------------|------|------|--------------------|--------------------------------------|---------------|-------------------------|--------------------------------------------------------------|-------------------|------------------|--------------|-------|----------------------------------------|
| Coren        | 1965 | #1   | ~ 30               | EDS, cataplexy, sleep paralysis, HH  | ~ 30          | no                      | MH, sexual and paranoid delusion, false memories             | n.a.              | Delusional NT1   | Other        | 2     | one stroke in childhood                |
| Shapiro      | 1976 | #1   | 42                 | EDS, insomnia, HH, unclear cataplexy | n.a.          | no                      | visual and auditory HH, mystic delusion                      | n.a.              | Delusional NT1?  | Other        | 2     | n.a.                                   |
| Pfefferbaum  | 1977 | #1   | 34                 | EDS, cataplexy, sleep paralysis      | ~ 32          | no                      | MH, jealousy and paranoid delusion                           | n.a.              | NT1, SCZ         | Other        | 3     | tardive dyskinesia                     |
| Schrader     | 1984 | #1   | < 60               | EDS, cataplexy, sleep paralysis, HH  | 64            | dextroamphetamine       | VH, mystic and jealousy delusion                             | n.a.              | Narcolepsy       | Other        | 2     | alcohol?                               |
| Cadieux      | 1985 | #1   | 12                 | EDS, cataplexy                       | n.a.          | stimulant               | AH, disorganisation, paranoid delusion                       | n.a.              | NT1, SCZ         | Other        | 3     | tardive dyskinesia                     |
| Trzepacz     | 1987 | #1   | 32                 | EDS, cataplexy, sleep paralysis, HH  | > 32          | methylphenidate         | mystic, hypochondriac, megalomaniac delusion                 | n.a.              | NT1, BD          | DCSAD        | 3     | n.a.                                   |
| Douglass     | 1991 | #1   | 13                 | EDS, cataplexy, sleep paralysis, HH  | adolescence   | no                      | MH, paranoid, hypochondriac and fantastic delusion           | DR2 DQ1, 2        | Delusional NT1   | DCSAD, D3    | 2     | rheumatic fever, restless leg syndrome |
| Douglass     | 1991 | #2   | n.a.               | EDS, sleep paralysis, HH             | childhood     | no                      | MH, sexual, paranoid (poisoning) delusion                    | DR2 DQ1, 2        | Delusional NT1   | DCSAD, D3    | 2     | n.a.                                   |
| Douglass     | 1991 | #3   | childhood          | EDS, cataplexy, HH                   | childhood     | no                      | MH, mystic and paranoid delusion                             | DR3 DQ1, 2        | Delusional NT1   | DCSAD, D3    | 2     | n.a.                                   |
| Douglass     | 1991 | #4   | n.a.               | EDS, cataplexy, HH                   | 6             | no                      | MH, zoopsia, paranoid and mystic delusion, influence syndrom | DR2 DQ1           | Delusional NT1   | DCSAD, D3    | 2     | n.a.                                   |
| Douglass     | 1991 | #5   | 21                 | EDS, cataplexy, sleep paralysis, HH  | > 14          | no                      | MH, zoopsia, sexual delusion, influence syndrom              | DR3 DQ2, 3        | Delusional NT1   | DCSAD, D3    | 2     | very unusual results                   |
| Hays         | 1992 | #1   | n.a.               | EDS, cataplexy, sleep paralysis, HH  | n.a.          | no                      | MH, sexual delusion, false memories?                         | n.a.              | NT1, SCZ?        | DCSAD, D3    | 3     | n.a.                                   |
| Hays         | 1992 | #2   | n.a.               | HH, sleep paralysis?                 | n.a.          | no                      | MH, sexual, paranoid and mystic delusion, false memories?    | DR2               | Delusional NT1   | DCSAD, D3    | 2     | n.a.                                   |
| Hays         | 1992 | #3   | n.a.               | EDS, cataplexy, sleep paralysis, HH  | n.a.          | no                      | hallucinations, (sexual) delusion                            | n.a.              | NT1, SCZ?        | DCSAD, D3    | 3     | n.a.                                   |
| Hays         | 1992 | #4   | n.a.               | EDS, cataplexy, sleep paralysis, HH  | n.a.          | no                      | MH, sexual delusion?, false memory?                          | n.a.              | (Delusional) NT1 | DCSAD, D3    | 2     | n.a.                                   |
| Takeuchi     | 2000 | #1   | 20                 | EDS, cataplexy, sleep paralysis, HH  | 41            | no                      | AH, observation and reference delusion                       | HLA +             | Delusional NT1   | ICSD         | 2     | n.a.                                   |
| Bhat         | 2002 | #1   | 48                 | EDS, cataplexy                       | before NT1    | no                      | disorganisation, paranoid delusion                           | HLA +             | NT1, SCZ         | ICSD         | 3     | n.a.                                   |
| Szucs        | 2003 | #1   | 23                 | EDS, cataplexy, vivid dreams         | 23            | no                      | MH, sexual delusion                                          | HLA +             | Delusional NT1   | ICSD         | 2     | n.a.                                   |
| Szucs        | 2003 | #2   | < 45               | EDS, cataplexy,                      | 45            | no                      | MH, paranoid & sexual delusion, confusional false memories   | HLA +             | Delusional NT1   | ICSD         | 2     | n.a.                                   |
| Kishi        | 2004 | #1   | 13                 | EDS, cataplexy, sleep paralysis, HH  | 19            | no                      | AH, disorganization, paranoid and reference delusion         | DR2               | NT1, SCZ         | ICSD, D4     | 3     | n.a.                                   |
| Vorspan      | 2005 | #1   | 14                 | n.a.                                 | 17            | modafinil               | AH, VH, paranoid and reference delusion                      | n.a.              | Narcolepsy       | n.a.         | 2     | n.a.                                   |
| Walterfang   | 2005 | #1   | 17                 | EDS, cataplexy, sleep paralysis, HH  | 24            | no                      | Paranoid delusion                                            | no                | NT1, SCZ         | ICSD-2, D4TR | 3     | n.a.                                   |
| Walterfang   | 2005 | #2   | 13                 | EDS, cataplexy, sleep paralysis, HH  | 21            | stimulant               | Delusion, disorganization                                    | HLA +             | NT1, SCZ         | ICSD-2, D4TR | 3     | n.a.                                   |

| First Author | Year | Case    | AAO sleep symptoms | Sleep Symptoms                      | AAO psychotic | Meds prior to psychosis | Psychotic symptoms                                            | DQB1* 06:02 / CSF | Diagnosis      | Criteria      | Group | Other medical condition (s)          |
|--------------|------|---------|--------------------|-------------------------------------|---------------|-------------------------|---------------------------------------------------------------|-------------------|----------------|---------------|-------|--------------------------------------|
| Kondziella   | 2006 | #1      | 17                 | EDS, cataplexy, sleep paralysis, HH | > 17          | no                      | paranoid and reference delusion                               | no                | NT1, SA        | ICSD-2, ICD10 | 3     | partial complex epilepsy?            |
| Melamed      | 2009 | #1      | ~ 4                | EDS, cataplexy                      | 20            | methylphenidate         | AH, influence syndrom                                         | - / refusal       | NT1, psychosis | ICSD-2        | 3     | developmental difficulties           |
| Undurraga    | 2009 | #1      | 15                 | EDS, cataplexy                      | 21            | stopped > 5 years       | MH, disorganization, paranoid & mystic delusion, influence sd | HLA +, Hcrt1 ↓    | NT1, SD        | ICSD-2, D4TR  | 3     | n.a.                                 |
| Crosby       | 2011 | #1      | 22                 | EDS, cataplexy, sleep paralysis     | 22            | modafinil, venlafaxine  | megalomaniac delusion, (mania)                                | HLA +             | NT1, BD        | ICSD-2, D4TR  | 3     | n.a.                                 |
| Tsutsui      | 2012 | 4(B)    | adolescence        | EDS, HH                             | 58            | methylphenidate         | AH, VH, paranoid and jealousy delusion                        | HLA +, Hcrt1 ↓    | NT1, DD        | ICSD-2, D4TR  | 3     | Parkinson's disease, NMDAR+          |
| Tsutsui      | 2012 | 5(B)    | n.a.               | n.a.                                | n.a.          | stimulant               | AH, VH, delusion                                              | HLA +, Hcrt1 ↓    | NT1, SCZ       | ICSD-2, D4TR  | 3     | n.a.                                 |
| Tsutsui      | 2012 | 6(B)    | n.a.               | n.a.                                | n.a.          | stimulant               | AH, delusion                                                  | HLA +, Hcrt1 ↓    | NT1, SCZ       | ICSD-2, D4TR  | 3     | n.a.                                 |
| Tsutsui      | 2012 | N(B)#1  | n.a.               | n.a.                                | n.a.          | stimulant               | AH                                                            | HLA +, Hcrt1 ↓    | NT1, psychosis | ICSD-2, D4TR  | 3     | n.a.                                 |
| Tsutsui      | 2012 | N(B)#2  | n.a.               | n.a.                                | n.a.          | stimulant               | AH                                                            | HLA +, Hcrt1 ↓    | NT1, SCZ       | ICSD-2, D4TR  | 3     | n.a.                                 |
| Chien        | 2013 | #1      | 18                 | n.a.                                | 18            | sodium oxybate          | AH, disorganisation, paranoid delusion, derealization         | n.a.              | Narcolepsy     | ICSD-2        | 2     | suicide attempt                      |
| Chen         | 2014 | #1      | 10                 | EDS, cataplexy                      | 12            | no                      | MH, disorganisation, influence syndrome, reference delusion   | n.a.              | NT1, SCZ       | ICSD-3, D4TR  | 3     | n.a.                                 |
| Canellas     | 2014 | M1      | 13                 | EDS, cataplexy, sleep paralysis, HH | 20            | no                      | AH, disorganization, jealousy delusion                        | HLA +             | NT1, SD        | ICSD-3, D4TR  | 3     | hypothyroidism                       |
| Canellas     | 2014 | M3      | 8                  | EDS, cataplexy, sleep paralysis, HH | 20            | modafinil               | AH, disorganization, paranoid delusion                        | HLA +, Hcrt1 ↓    | NT1, SA        | ICSD-3, D4TR  | 3     | n.a.                                 |
| Canellas     | 2014 | M5      | 15                 | EDS, cataplexy, sleep paralysis, HH | 16            | fluoxetine              | AH, disorganization, paranoid delusion                        | HLA +             | NT1, SD        | ICSD-3, D4TR  | 3     | n.a.                                 |
| Canellas     | 2014 | M7      | 12                 | EDS, cataplexy, HH                  | 15            | n.a.                    | AH, disorganization, paranoid delusion                        | HLA +, Hcrt1 ↓    | NT1, SCZ       | ICSD-3, D4TR  | 3     | n.a.                                 |
| Canellas     | 2014 | M13     | 14                 | EDS, cataplexy, sleep paralysis, HH | 16            | slegiline               | AH, disorganization, sexual delusion                          | HLA +, Hcrt1 ↓    | NT1, SCZ       | ICSD-3, D4TR  | 3     | cannabis, alcohol abuse              |
| Canellas     | 2014 | M15     | 10                 | EDS, cataplexy, sleep paralysis, HH | 11            | n.a.                    | AH, disorganization, paranoid delusion                        | HLA +             | NT1, SCZ       | ICSD-3, D4TR  | 3     | learning disability, G6PD deficiency |
| Canellas     | 2014 | M19     | 11                 | EDS, cataplexy, sleep paralysis, HH | 23            | n.a.                    | AH, disorganization, paranoid & megalomaniacal delusion       | HLA +, Hcrt1 ↓    | NT1, SCZ       | ICSD-3, D4TR  | 3     | eating disorder                      |
| Canellas     | 2014 | M21     | 14                 | EDS, cataplexy, sleep paralysis, HH | 15            | n.a.                    | AH, disorganization, paranoid delusion                        | HLA +             | NT1, SD        | ICSD-3, D4TR  | 3     | learning disability, brain trauma    |
| Canellas     | 2014 | M9 (K)  | 14                 | EDS, cataplexy, sleep paralysis, HH | 15            | no                      | AH, disorganization, paranoid delusion                        | Hcrt1 ↓           | NT1, SCZ       | ICSD-3, D4TR  | 3     | atopic dermatitis                    |
| Canellas     | 2014 | M17 (K) | 15                 | EDS, cataplexy, sleep paralysis, HH | 18            | no                      | AH, disorganization, paranoid delusion                        | Hcrt1 ↓           | NT2, SCZ       | ICSD-3, D4TR  | 3     | n.a.                                 |
| Dauvilliers  | 2016 | 1       | 16                 | EDS, cataplexy, sleep paralysis, HH | 15            | no                      | AH, disorganization, paranoid delusion                        | HLA +, Hcrt1 ↓    | NT1, SCZ       | ICSD-3, D4TR  | 3     | n.a.                                 |
| Dauvilliers  | 2016 | 2       | 8                  | EDS, cataplexy, sleep paralysis     | 27            | no                      | AH, disorganization, paranoid delusion                        | HLA +             | NT1, SCZ       | ICSD-3, D4TR  | 3     | n.a.                                 |
| Dauvilliers  | 2016 | 3       | 14                 | EDS                                 | 17            | no                      | disorganization, paranoid delusion                            | HLA +, Hcrt1 ↓    | NT1, SCZ       | ICSD-3, D4TR  | 3     | n.a.                                 |
| Dauvilliers  | 2016 | 4       | 7                  | EDS, cataplexy, HH                  | 7             | no                      | AH, disorganization, paranoid delusion                        | HLA +, Hcrt1 ↓    | NT1, SCZ       | ICSD-3, D4TR  | 3     | n.a.                                 |
| Dauvilliers  | 2016 | 5       | 15                 | EDS, cataplexy                      | 39            | no                      | AH, disorganization, paranoid delusion                        | HLA +, Hcrt1 ↓    | NT1, SCZ       | ICSD-3, D4TR  | 3     | heroin and cocaine abuse             |

| First Author  | Year | Case | AAO sleep symptoms | Sleep Symptoms                       | AAO psychotic | Meds prior to psychosis | Psychotic symptoms                                         | DQB1* 06:02 / CSF | Diagnosis        | Criteria     | Group | Other medical condition (s) |
|---------------|------|------|--------------------|--------------------------------------|---------------|-------------------------|------------------------------------------------------------|-------------------|------------------|--------------|-------|-----------------------------|
| Dauvilliers   | 2016 | 6    | 36                 | EDS, cataplexy, sleep paralysis, HH  | 47            | sodium oxybate          | AH, disorganization, paranoid delusion                     | HLA +, Hcrt1 ↓    | NT1, SCZ         | ICSD-3, D4TR | 3     | n.a.                        |
| Dauvilliers   | 2016 | 7    | 30                 | EDS, cataplexy, sleep paralysis, HH  | 45            | mazindol                | AH, disorganization, paranoid delusion                     | HLA +             | NT1, SCZ         | ICSD-3, D4TR | 3     | n.a.                        |
| Dauvilliers   | 2016 | 8    | 10                 | EDS, cataplexy, sleep paralysis, HH  | 23            | no                      | AH, disorganization, paranoid & magical delusion           | HLA +, Hcrt1 ↓    | NT1, SCZ         | ICSD-3, D4TR | 3     | cannabis abuse              |
| Dauvilliers   | 2016 | 9    | 29                 | EDS, cataplexy, sleep paralysis, HH  | 30            | modafinil               | AH, disorganization, paranoid delusion                     | HLA +, Hcrt1 ↓    | NT1, Schizotypy  | ICSD-3, D4TR | 3     | n.a.                        |
| Dauvilliers   | 2016 | 10   | 12                 | EDS, cataplexy, HH                   | 22            | no                      | AH, disorganization, paranoid delusion                     | HLA +, Hcrt1 ↓    | NT1, SCZ         | ICSD-3, D4TR | 3     | n.a.                        |
| Sarkanen      | 2016 | #1   | 11                 | EDS, cataplexy, insomnia, HH         | 13            | IVIg 1g/kg x 2d         | MH, behavioral disorganization, oneiroid delusion          | Hcrt1 ↓           | H1N1-vaccin N    | Other        | 2     | encephalitis                |
| Canellas-Dols | 2017 | #1   | < 13               | EDS, cataplexy, insomnia, nightmares | 12            | no                      | MH, unspecified delusion                                   | HLA +, Hcrt1 ↓    | NT1, SD          | ICSD-3, D5   | 3     | ADHD, polycystic ovaries    |
| Buckley       | 2017 | #1   | < 20               | EDS, cataplexy, HH                   | 20            | sodium oxybate          | VH&AH, disorganization, paranoid/mystic/reference delusion | n.a.              | NT1, side-effect | ICSD-3       | 2     | n.a.                        |
| Cavalier      | 2018 | #1   | 12                 | EDS, cataplexy, SP, insomnia, HH     | 17            | amphetamine             | MH, disorganization, paranoid delusion                     | n.a.              | NT1, SCZ         | ICSD-3, D5   | 3     | n.a.                        |

The table summarizes available clinical data from 58 cases (from 27 papers) that were included in the quantitative analysis of case reports. The "Group" column indicates to which group in our quantitative analysis the case was assigned (2= Narcolepsy with severe or atypical hallucinations or delusional thoughts, 3 = Narcolepsy with comorbid psychotic disorder). Criteria = "other" when no classification system was cited or if some of the criteria required by a system were not mentioned. Abbreviations: AAO = Age at Onset; ADHD = attention deficit hyperactivity disorder; AH = auditory hallucinations; BD = bipolar disorder; DCSAD = Diagnostic Classification of Sleep and Arousal Disorders ; DD : delusional disorder ; DSM3 = Diagnostic and Statistical Manual of Mental Disorders 3rd edition; DSM4TR : Diagnostic and Statistical Manual of Mental Disorders 4th edition - Text Revision ; EDS = Excessive daytime sleepiness; HH = hypnagogic hallucinations; ICSD : International Classification of Sleep Disorders ; MH = multimodal hallucinations; SA = schizoaffective disorder SD = schizophreniform disorder; SP = Sleep paralysis; yo = years old.

**Table S2. Articles about narcolepsy and psychotic symptoms from systematic search that were reviewed in full text, by article type**

| Article type     | First Author, year                                                                                                                                                                                                                                                                                                                                                                                                                                                                                                                                                                                                                                                                                                                                                                              | Number of articles |
|------------------|-------------------------------------------------------------------------------------------------------------------------------------------------------------------------------------------------------------------------------------------------------------------------------------------------------------------------------------------------------------------------------------------------------------------------------------------------------------------------------------------------------------------------------------------------------------------------------------------------------------------------------------------------------------------------------------------------------------------------------------------------------------------------------------------------|--------------------|
| Case reports     | Coren <i>et al.</i> 1965, Shapiro <i>et al.</i> 1976, Pfefferbaum <i>et al.</i> 1977, Schrader <i>et al.</i> 1984, Cadieux <i>et al.</i> 1985, Trzepacz <i>et al.</i> 1987, Douglass <i>et al.</i> 1991, Hays <i>et al.</i> 1992, Takeuchi <i>et al.</i> 2000, Bhat <i>et al.</i> 2002, Szucs <i>et al.</i> 2003, Kishi <i>et al.</i> 2004, Clemons <i>et al.</i> 2004, Vorspan <i>et al.</i> 2005*, Walterfang <i>et al.</i> 2005, Kondziella <i>et al.</i> 2006, Undurraga <i>et al.</i> 2009, Melamed <i>et al.</i> 2009, Crosby <i>et al.</i> 2011, Tsutsui <i>et al.</i> 2012*, Chien <i>et al.</i> 2013*, Chen <i>et al.</i> 2014*, Canellas <i>et al.</i> 2014, Sarkanen <i>et al.</i> 2016*, Canellas-Dols <i>et al.</i> 2017, Buckley <i>et al.</i> 2018, Cavalier <i>et al.</i> 2018* | n=27               |
| Cohort Studies   | Sours <i>et al.</i> 1963, Krishnan <i>et al.</i> 1984, Wilcox <i>et al.</i> 1985, Douglass <i>et al.</i> 1993, Pawluk <i>et al.</i> 1995, Besset <i>et al.</i> 1996, Murali <i>et al.</i> 2006*, Fortuyn <i>et al.</i> 2009, MØller <i>et al.</i> 2009*, Leu-Semenescu <i>et al.</i> 2011, Mansukhani <i>et al.</i> 2012*, Lecendreux <i>et al.</i> 2012*, Davies <i>et al.</i> 2013, Huang <i>et al.</i> 2014, Wamsley <i>et al.</i> 2014, Plazzi <i>et al.</i> 2015, Szakacs <i>et al.</i> 2015*, Dauvilliers <i>et al.</i> 2016*, Sansa <i>et al.</i> 2016, Giannoccaro <i>et al.</i> 2017, Drakatos <i>et al.</i> 2017, Mayer <i>et al.</i> 2018, Thakrar <i>et al.</i> 2018                                                                                                                | n=23               |
| Review articles  | Mitler <i>et al.</i> 1993, Saucerman <i>et al.</i> 1997, Mitler <i>et al.</i> 2002, Tunnicliff <i>et al.</i> 2002, Douglass <i>et al.</i> 2003, Ivanenko <i>et al.</i> 2003*, Fuller <i>et al.</i> 2003, Banerjee <i>et al.</i> 2004, Houghton <i>et al.</i> 2004, Mahowald <i>et al.</i> 2005, Vignatelli <i>et al.</i> 2005, Lemon <i>et al.</i> 2006, Benca <i>et al.</i> 2007, Wise <i>et al.</i> 2007, Kumar <i>et al.</i> 2008, Vignatelli <i>et al.</i> 2008, Owen <i>et al.</i> 2008, Gowda <i>et al.</i> 2014, Rocca <i>et al.</i> 2015*, Kollb-Sielecka <i>et al.</i> 2017, Kornum <i>et al.</i> 2017, Romigi <i>et al.</i> 2018, Moresco <i>et al.</i> 2018, Postiglione <i>et al.</i> 2018*, Yang <i>et al.</i> 2019, Li <i>et al.</i> 2020                                         | n=26               |
| Clinical trials  | Parkes <i>et al.</i> 1979, Guilleminault <i>et al.</i> 1986, Schrader <i>et al.</i> 1986, Roselaar <i>et al.</i> 1987, Mitler <i>et al.</i> 1993, US Modafinil Study Group 1998, US Modafinil Study Group 2000, US Xyrem Study Group 2002, Schwartz <i>et al.</i> 2003, Thorpy <i>et al.</i> 2003, US Xyrem Study Group 2003, Becker <i>et al.</i> 2004, Xyrem International Study Group 2005, Harsh <i>et al.</i> 2006, Dauvilliers <i>et al.</i> 2013, Mamelak <i>et al.</i> 2015, Ruoff <i>et al.</i> 2016, Szakacz <i>et al.</i> 2017, Plazzi <i>et al.</i> 2018*, Thorpy <i>et al.</i> 2019                                                                                                                                                                                                | n=20               |
| Meta-analyses ** | Keam <i>et al.</i> 2007, Golicki <i>et al.</i> 2010, Alsaikh <i>et al.</i> 2012, Lehert <i>et al.</i> 2018                                                                                                                                                                                                                                                                                                                                                                                                                                                                                                                                                                                                                                                                                      | n=4                |
|                  |                                                                                                                                                                                                                                                                                                                                                                                                                                                                                                                                                                                                                                                                                                                                                                                                 |                    |
|                  | *Study includes child(ren) or adolescent(s).                                                                                                                                                                                                                                                                                                                                                                                                                                                                                                                                                                                                                                                                                                                                                    |                    |
|                  | **These are all meta-analyses of narcolepsy clinical trials with relevant information; we found no meta-analyses related to psychotic symptoms.                                                                                                                                                                                                                                                                                                                                                                                                                                                                                                                                                                                                                                                 |                    |



Halluc----- Delusions-----

| Author        | Case# | Group* | AAO Sleep Symptoms | AAO Psychosis | Cataplexy | Sleep Paralysis | Sleep related Hallucinations | Suspected drug induced psych | Suspected cause (drug) | Auditory | Visual | Multimodal | Zoopsia | Delusion | Persecutory | Poisoning | Sexual | Megalomaniac | Mystical | Jealous | Hypochondriac | Fantastic | Influence | Reference | Oniroid | Disorg | Derealization | False memories |
|---------------|-------|--------|--------------------|---------------|-----------|-----------------|------------------------------|------------------------------|------------------------|----------|--------|------------|---------|----------|-------------|-----------|--------|--------------|----------|---------|---------------|-----------|-----------|-----------|---------|--------|---------------|----------------|
| Tsutsui       | 6     | 3      |                    |               |           |                 |                              | 1                            | ?                      | 1        | 0      | 0          | 0       | 1        | 0           | 0         | 0      | 0            | 0        | 0       | 0             | 0         | 0         | 0         | 0       | 0      | 0             | 0              |
| Tsutsui       | 1     | 3      |                    |               |           |                 |                              | 1                            | ?                      | 1        | 0      | 0          | 0       | 0        | 0           | 0         | 0      | 0            | 0        | 0       | 0             | 0         | 0         | 0         | 0       | 0      | 0             | 0              |
| Tsutsui       | 2     | 3      |                    |               |           |                 |                              | 1                            | ?                      | 1        | 0      | 0          | 0       | 0        | 0           | 0         | 0      | 0            | 0        | 0       | 0             | 0         | 0         | 0         | 0       | 0      | 0             | 0              |
| Chien         | 1     | 2      | 18                 | 18            |           |                 |                              | 1                            | SO                     | 1        | 0      | 0          | 0       | 1        | 1           | 0         | 0      | 0            | 0        | 0       | 0             | 0         | 0         | 0         | 0       | 1      | 1             | 0              |
| Chen          | 1     | 3      | 10                 | 12            | 1         | 0               | 1                            | 0                            |                        | 1        | 1      | 1          | 0       | 1        | 0           | 0         | 0      | 0            | 0        | 0       | 0             | 0         | 1         | 1         | 0       | 1      | 0             | 0              |
| Canellas      | 1     | 3      | 13                 | 20            | 1         | 1               | 1                            | 0                            |                        | 1        | 0      | 0          | 0       | 1        | 0           | 0         | 0      | 0            | 0        | 1       | 0             | 0         | 0         | 0         | 0       | 1      | 0             | 0              |
| Canellas      | 3     | 3      | 8                  | 20            | 1         | 1               | 1                            | 1                            | mod                    | 1        | 0      | 0          | 0       | 1        | 1           | 0         | 0      | 0            | 0        | 0       | 0             | 0         | 0         | 0         | 0       | 1      | 0             | 0              |
| Canellas      | 5     | 3      | 15                 | 16            | 1         | 1               | 1                            | 0                            |                        | 1        | 0      | 0          | 0       | 1        | 1           | 0         | 0      | 0            | 0        | 0       | 0             | 0         | 0         | 0         | 0       | 1      | 0             | 0              |
| Canellas      | 7     | 3      | 12                 | 15            | 1         | 0               | 1                            |                              |                        | 1        | 0      | 0          | 0       | 1        | 1           | 0         | 0      | 0            | 0        | 0       | 0             | 0         | 0         | 0         | 0       | 1      | 0             | 0              |
| Canellas      | 13    | 3      | 14                 | 16            | 1         | 1               | 1                            | 1                            | meth                   | 1        | 0      | 0          | 0       | 1        | 0           | 0         | 1      | 0            | 0        | 0       | 0             | 0         | 0         | 0         | 0       | 1      | 0             | 0              |
| Canellas      | 15    | 3      | 10                 | 11            | 1         | 1               | 1                            |                              |                        | 1        | 0      | 0          | 0       | 1        | 1           | 0         | 0      | 0            | 0        | 0       | 0             | 0         | 0         | 0         | 0       | 1      | 0             | 0              |
| Canellas      | 19    | 3      | 11                 | 23            | 1         | 1               | 1                            |                              |                        | 1        | 0      | 0          | 0       | 1        | 1           | 0         | 0      | 1            | 0        | 0       | 0             | 0         | 0         | 0         | 0       | 1      | 0             | 0              |
| Canellas      | 21    | 3      | 14                 | 15            | 1         | 1               | 1                            |                              |                        | 1        | 0      | 0          | 0       | 1        | 1           | 0         | 0      | 0            | 0        | 0       | 0             | 0         | 0         | 0         | 0       | 1      | 0             | 0              |
| Canellas      | 9     | 3      | 14                 | 15            | 1         | 1               | 1                            | 0                            |                        | 1        | 0      | 0          | 0       | 1        | 1           | 0         | 0      | 0            | 0        | 0       | 0             | 0         | 0         | 0         | 0       | 1      | 0             | 0              |
| Canellas      | 17    | 3      | 15                 | 18            | 1         | 1               | 1                            | 0                            |                        | 1        | 0      | 0          | 0       | 1        | 1           | 0         | 0      | 0            | 0        | 0       | 0             | 0         | 0         | 0         | 0       | 1      | 0             | 0              |
| Dauvilliers   | 1     | 3      | 16                 | 15            | 1         | 1               | 1                            | 0                            |                        | 1        | 0      | 0          | 0       | 1        | 1           | 0         | 0      | 0            | 0        | 0       | 0             | 0         | 0         | 0         | 0       | 1      | 0             | 0              |
| Dauvilliers   | 2     | 3      | 8                  | 27            | 1         | 1               | 0                            | 0                            |                        | 1        | 0      | 0          | 0       | 1        | 1           | 0         | 0      | 0            | 0        | 0       | 0             | 0         | 0         | 0         | 0       | 1      | 0             | 0              |
| Dauvilliers   | 3     | 3      | 14                 | 17            | 0         | 0               | 0                            | 0                            |                        | 0        | 0      | 0          | 0       | 1        | 1           | 0         | 0      | 0            | 0        | 0       | 0             | 0         | 0         | 0         | 0       | 1      | 0             | 0              |
| Dauvilliers   | 4     | 3      | 7                  | 7             | 1         | 0               | 1                            | 0                            |                        | 1        | 0      | 0          | 0       | 1        | 1           | 0         | 0      | 0            | 0        | 0       | 0             | 0         | 0         | 0         | 0       | 1      | 0             | 0              |
| Dauvilliers   | 5     | 3      | 15                 | 39            | 1         | 0               | 0                            | 0                            |                        | 1        | 0      | 0          | 0       | 1        | 1           | 0         | 0      | 0            | 0        | 0       | 0             | 0         | 0         | 0         | 0       | 1      | 0             | 0              |
| Dauvilliers   | 6     | 3      | 36                 | 47            | 1         | 1               | 1                            | 1                            | SO                     | 1        | 0      | 0          | 0       | 1        | 1           | 0         | 0      | 0            | 0        | 0       | 0             | 0         | 0         | 0         | 0       | 1      | 0             | 0              |
| Dauvilliers   | 7     | 3      | 30                 | 45            | 1         | 1               | 1                            | 1                            | mazindo                | 1        | 0      | 0          | 0       | 1        | 1           | 0         | 0      | 0            | 0        | 0       | 0             | 0         | 0         | 0         | 0       | 1      | 0             | 0              |
| Dauvilliers   | 8     | 3      | 10                 | 23            | 1         | 1               | 1                            | 0                            |                        | 1        | 0      | 0          | 0       | 1        | 1           | 0         | 0      | 0            | 1        | 0       | 0             | 0         | 0         | 0         | 0       | 1      | 0             | 0              |
| Dauvilliers   | 9     | 3      | 29                 | 30            | 1         | 1               | 1                            | 1                            | mod                    | 1        | 0      | 0          | 0       | 1        | 1           | 0         | 0      | 0            | 0        | 0       | 0             | 0         | 0         | 0         | 0       | 1      | 0             | 0              |
| Dauvilliers   | 10    | 3      | 12                 | 22            | 1         | 0               | 1                            | 0                            |                        | 1        | 0      | 0          | 0       | 1        | 1           | 0         | 0      | 0            | 0        | 0       | 0             | 0         | 0         | 0         | 0       | 1      | 0             | 0              |
| Sarkanen      | 1     | 2      | 11                 | 13            | 1         | 0               | 1                            | 0                            |                        | 1        | 1      | 1          | 0       | 1        | 0           | 0         | 0      | 0            | 0        | 0       | 0             | 0         | 0         | 0         | 1       | 1      | 0             | 0              |
| Canellas-Dols | 1     | 3      | 12                 | 12            | 1         | 0               | 0                            | 0                            |                        | 1        | 1      | 1          | 0       | 1        | 0           | 0         | 0      | 0            | 0        | 0       | 0             | 0         | 0         | 0         | 0       | 0      | 0             | 0              |
| Buckley       | 1     | 2      | 20                 | 20            | 1         | 0               | 1                            | 1                            | SO                     | 1        | 1      | 1          | 0       | 1        | 1           | 0         | 0      | 0            | 1        | 0       | 0             | 0         | 0         | 1         | 0       | 1      | 0             | 0              |
| Cavalier      | 1     | 3      | 12                 | 17            | 1         | 1               | 1                            | 1                            | amph                   | 1        | 0      | 0          | 0       | 1        | 1           | 0         | 0      | 0            | 0        | 0       | 0             | 0         | 0         | 0         | 0       | 1      | 0             | 0              |

\*Group: 2= Narcolepsy with severe or atypical hallucinations or delusional thoughts, 3 = Narcolepsy with comorbid psychotic disorder

For individual symptoms, 1= present, 0 = absent based on the judgment of the reviewer (rating is 0 unless the symptom is specifically mentioned or described).

amph-amphetamine; mod=modafinil; SO=sodium oxybate.

**Table S4: Cohort studies relevant to narcolepsy and psychosis**

| Author, Year   | Primary Group, N, mean age                                                                                        | Control group, N                                                                                                                                   | Comparison, Measure                                                                                                                                                 | Design          | Evaluations                                                       | Outcomes related to psychotic features                                                                                                                                                                                                                                                                                                                                                                                                                                                              |
|----------------|-------------------------------------------------------------------------------------------------------------------|----------------------------------------------------------------------------------------------------------------------------------------------------|---------------------------------------------------------------------------------------------------------------------------------------------------------------------|-----------------|-------------------------------------------------------------------|-----------------------------------------------------------------------------------------------------------------------------------------------------------------------------------------------------------------------------------------------------------------------------------------------------------------------------------------------------------------------------------------------------------------------------------------------------------------------------------------------------|
| Sours, 1963    | Narcolepsy, N=83 (75 primary, 13 secondary narcolepsy)<br><i>Columbia-Presbyterian Medical Center (New York).</i> | n.a.                                                                                                                                               | Prevalence of SCZ in narcolepsy patients.                                                                                                                           | Retrospective   | Chart review                                                      | 7 (8.4%) comorbid schizophrenia diagnosis<br>21 (23%) sleep-related halluc (23.6% of primary, 7.6% of secondary narcolepsy)                                                                                                                                                                                                                                                                                                                                                                         |
| Krishnan, 1984 | Narcolepsy (male only), N=24<br><i>VA Hospital, 50 yr (34-68).</i>                                                | n.a.                                                                                                                                               | Prevalence of psychiatric comorbidities.                                                                                                                            | Retrospective   | Chart review                                                      | N= (58%) had sleep related hallucinations<br>N=0 (0%) comorbid psychotic disorder                                                                                                                                                                                                                                                                                                                                                                                                                   |
| Wilcox, 1985   | Narcolepsy, N=28<br><i>University of Iowa Hospitals Clinics</i>                                                   | Sex- and age-matched healthy Controls, N=28                                                                                                        | Prevalence of SCZ, depression, mania, and sleep-related halluc.                                                                                                     | Retrospective   | Chart review                                                      | Narcolepsy vs. controls:<br>Halluc: 12 (42.9%) vs. 0 (0%) (sleep-related halluc unrelated to psychopathology (p> 0.20)<br>Delusions: 11 (39.3%) vs. 0 (0%)<br>Incoherence: 10 (35.7%) vs. 2 (7.14%)<br>Deterioration: 11 (39.3%) vs. 1 (3.57%)<br>SCZ, narcolepsy vs. controls: OR=6.72 (p=0.007)<br>1 case had history of psychostimulant-induced psychosis                                                                                                                                        |
| Douglass, 1993 | SCZ, N=56<br><i>Inpatients in two VA Hospitals</i><br>mean age: only specified in subgroups                       | Race-matched controls (not tested for the presence of psychiatric illness), N=56<br><i>University of Michigan Tissue Typing Laboratory records</i> | 1. Frequency of Narcolepsy Associated Antigens (here HLA-DR15, DQ6) in schizophrenia compared to controls.<br>2. Prevalence of Narcolepsy in HLQ-DR1(, DQ6 subgroup | Cross-sectional | SADS-L (inclusion)<br>BPRS<br>SDQ<br>HLA typing for HLA-DR15, DQ6 | BPRS: mean 46.9 vs. 32.8 in HLA DR15, DQ6 pos vs. neg (p=0.008)<br>HLA DR15, DQ6 35.7% in SCZ vs. 12.5% controls, RR=3.89, p<0.004<br>Tolerated PSG/MSLT: 16% of SCZ; 45% of SCZ with HLA DR15, DQ6+<br>Narcolepsy dx: 3.8% of SCZ; 10% of SCZ with HLA DR15, DQ6+<br>SCZ cases did not meet current diagnostic criteria.<br>2 definite and 1 partial narcolepsy cases reportedly responded well to stimulants (sleep and psychosis sx).<br><b>Proposed the term "psychotic form of narcolepsy"</b> |
| Pawluk, 1995   | Narcolepsy, N=11<br><i>Minnesota Regional Sleep Disorder Center</i><br>54.5±8.1 yr.                               | n.a.                                                                                                                                               | Side effects on high dosage of MPH (>100mg daily) during >5years                                                                                                    | Cross-sectional | MMPI, SCL-90, BDI, BAI, BPRS, HRSD, Stanford Sleepiness Scale     | 54.5% with multimodal sleep-related halluc, 18.2% without full insight.<br>9.1% had elaborate, prolonged, bizarre halluc (n=1).<br>MPH treatment duration 17.1 ± 7.3 yr.                                                                                                                                                                                                                                                                                                                            |
| Besset, 1996   | Narcolepsy-cataplexy, N=140,<br><i>Sleep Disorder Center, Montpellier (France).</i><br>42.26±19.19 yr             | n.a.                                                                                                                                               | Side effects of modafinil                                                                                                                                           | Prospective     | Chart review                                                      | 0% psychotic adverse events on 200-400 mg/d, 22.05 ± 24.9 mo                                                                                                                                                                                                                                                                                                                                                                                                                                        |
| Murali, 2006   | Pediatric Narcolepsy, N=8<br><i>Sleep Disorder Center (Rochester)</i> 15.3 (11-17) yo                             | n.a.                                                                                                                                               | Side effects of SO                                                                                                                                                  | Retrospective   | Chart review                                                      | 1 patient with dissociation feeling (age 16)<br>SO+amphetamine .mean 11.4 mo                                                                                                                                                                                                                                                                                                                                                                                                                        |

|                     |                                                                                                                                                             |                                                                                                                                                                     |                                                                                                                     |                 |                                  |                                                                                                                                                                                                                                                                                                                                                                                                                                                                                                                                                                                                        |
|---------------------|-------------------------------------------------------------------------------------------------------------------------------------------------------------|---------------------------------------------------------------------------------------------------------------------------------------------------------------------|---------------------------------------------------------------------------------------------------------------------|-----------------|----------------------------------|--------------------------------------------------------------------------------------------------------------------------------------------------------------------------------------------------------------------------------------------------------------------------------------------------------------------------------------------------------------------------------------------------------------------------------------------------------------------------------------------------------------------------------------------------------------------------------------------------------|
| Fortuyn, 2009       | Narcolepsy type 1, N=60<br><i>Center for Sleep-Wake Disorders (Kempenhaghe, Netherlands), and Department of Neurology (Leiden Netherlands).</i><br>43±16 yr | Schizophrenia, N=102. MESIFOS cohort : first psychotic episode f/u, 26 ±6 yr.<br><br>Healthy controls, N=120. Pop-based Nijmegen-Health Area-2 Study of psychiatric | Phenomenological comparison of hallucinations and delusions between narcolepsy, schizophrenia, and healthy subjects | Cross-sectional | SCAN 2.1 interviews              | Halluc: 83% SCZ vs. 2% control (p<0.001), 70% narcolepsy (p=0.89). Comment/conversing 42% SCZ, 17% narcolepsy.<br>NT1: simple visual 15%, complex visual 38%; auditory non-verbal 47% (steps, doors, animals), verbal 40%, tactile halluc 48%; olfactory 28%; multimodal 70%, kinetic 28%; out-of-body 18%; altered perception 25% (presence, derealization, depersonalization).<br>Delusions: SCZ>NT1 (p<0.001), NT1=control except fantastic delusions and false memories (p=0.036).<br><b>A few NT1 with classical delusions, thought disorder.</b>                                                 |
| Møller, 2009        | Pediatric Narcolepsy, N=6<br><i>Psychiatric Hospital (Risskov); Aalborg Denmark Pediatric Department (Aarhus), Denmark, 9.5 yr (7-12).</i>                  | n.a.                                                                                                                                                                | Side effects of venlafaxine                                                                                         | Retrospective   | Chart review                     | 0% psychotic adverse events. Sleep-related halluc improved in 2 of 6 patients on 37.5mg venlafaxine.                                                                                                                                                                                                                                                                                                                                                                                                                                                                                                   |
| Leu-Semenescu, 2011 | Narcolepsy, N=100<br>NT1 (N=54), NT2 (N=46)<br><i>Sleep Disorder Unit, Pitié Salpêtrière (Paris, France)</i>                                                | Idiopathic Parkinson disease, N=100<br><i>Movement disorder unit Pitié Salpêtrière France</i>                                                                       | Phenomenological comparison of hallucinations and delusions in NT1, NT2, Parkinson's disease                        | Cross-sectional | Semi structured interview        | Brief delusional psychosis in 2 (4%) of NT1.<br>Hallucination-like experiences in narcolepsy:<br>Illusions 11% (visual distortions, changing voices).<br>Halluc 45% (59% NT1; 28% NT2).<br>Unformed halluc 7% (presence, passage).<br>Visual halluc 43% (95% of those with halluc).<br>Kinetic halluc 24% total; Tactile 15%; Auditory 30%.<br>Halluc when wide awake 18%; Multimodal 33%.<br>Halluc assoc with sleep paralysis (OR=5.7, p=0.01),<br>REM Sleep Behaviour Disorder (OR = 4.3, p = 0.01).<br>In narcolepsy (vs. PD), more auditory, kinetic, <b>multimodal halluc, impaired insight.</b> |
| Lecendreux, 2012    | Pediatric NT1, N=27<br><i>Robert Debré Hospital (Paris) (N=5), Department of Neurological Sciences (Bologna) (N=22), 10.3±3.2 yr</i>                        | n.a.                                                                                                                                                                | Side effects of SO                                                                                                  | Retrospective   | Chart review                     | 63% had hypnagogic halluc at baseline.<br>25.9% developed hallucinations not related to sleep (no detail).                                                                                                                                                                                                                                                                                                                                                                                                                                                                                             |
| Mansukhani, 2012    | Pediatric NT1, N=15<br><i>Sleep Center (Rochester USA) 11 yr (3-17)</i>                                                                                     | n.a.                                                                                                                                                                | Side effects of SO                                                                                                  | Retrospective   | Chart review                     | 0% psychotic adverse event, 33 mo (3-90) follow-up .                                                                                                                                                                                                                                                                                                                                                                                                                                                                                                                                                   |
| Davies, 2013        | N=268 prescriptions for narcolepsy                                                                                                                          | n.a.                                                                                                                                                                | Side effects of Modafinil                                                                                           | Prospective     | Q-aires returned by prescribers. | 1 psychotic event (0.37%) median 8.88 days after treatment introduction (400mg/d).                                                                                                                                                                                                                                                                                                                                                                                                                                                                                                                     |



|                   |                                                                                                                                        |                                                                                        |                                                                                                                         |                          |                                                                                                                         |                                                                                                                                                                                                                                                                                                                                                                                                                                                          |
|-------------------|----------------------------------------------------------------------------------------------------------------------------------------|----------------------------------------------------------------------------------------|-------------------------------------------------------------------------------------------------------------------------|--------------------------|-------------------------------------------------------------------------------------------------------------------------|----------------------------------------------------------------------------------------------------------------------------------------------------------------------------------------------------------------------------------------------------------------------------------------------------------------------------------------------------------------------------------------------------------------------------------------------------------|
| Huang, 2014       | Pediatric NT1, N=102<br>Subgroup developed comorbid SCZ, N=10.<br><i>Pediatric sleep center, Child Psychiatry (Taiwan).</i>            | Age-gender matched (all children):<br>NT1, N=37;<br>SCZ, N=13.                         | Identification of SCZ in pediatric NT1.<br><br>Comparison of clinical features of dual diagnosis NT1+SCZ vs. NT1 or SCZ | Prospective case-control | Sleep q-aire, diaries, QOL, PSG, MSLT, HLA, K-SADS-E, PANSS, BDI, BAI, CGI-severity.                                    | 10 (9.8%) NT1 cases developed SCZ during 4 yr follow-up after 2.55±1.8 yr. Proposed greater risk in Chinese/ Japanese populations.<br>NT1+SCZ > SCZ for all psychopathology scales (p<0.05).;                                                                                                                                                                                                                                                            |
| Wamsley, 2014     | NT1, N=46<br><i>Beth Israel Deaconess Medical Center (Boston), and Leiden University Medical Center (Netherlands)</i><br>34.2 ±10.9 yr | Age-matched healthy controls, N=41,<br>32.7±11.6 yr                                    | Prevalence and predictors of dream delusion (dream-reality confusion)                                                   | Cross-sectional          | Phone interview: self-report q-aire on subjective memory (PRMQ); Hartmann Boundary Questionnaire.                       | Dream-reality confusion: NT1>control ( 83% vs. 15%, p<10 <sup>-10</sup> ; ≥1/mo in 95%; ≥1/wk in 65%).<br>NT1<Cont for prospective (p=0.00007) and retrospective (p=0.0004) memory (subjective self-report).<br>"Dream delusions" could be minutes-weeks.<br>Hypothesis of source memory defect. Dream delusion                                                                                                                                          |
| Plazzi, 2015      | Narcolepsy type 1, N=28<br><i>Clinic for Narcolepsy Bologna Italy.</i> 40.0±11.46 yr.                                                  | Schizophrenia, N=21<br><i>Psychiatry inpatients (Bologna, Italy).</i><br>36.8±12.0 yr. | Clinical characteristics; hallucinatory phenomena and psychiatric symptoms.                                             | Cross-sectional          | PANSS, HRSD, DES, STAI                                                                                                  | Significant group differences:<br>Hallucinations:<br>SCZ>NT1: Daytime, Unimodal, Verbal auditory, Conversing.<br>NT1>SCZ: Sleep-related, Nonverbal aud, Tactile-pain.<br>PANSS total score SCZ (84.95±18.81)>NT1(41.82±7.53).                                                                                                                                                                                                                            |
| Szakacs, 2015     | Pediatric NT1, N=38 (31 were post H1N1 vaccination). <i>Pop-based, Sweden.</i>                                                         | n.a.                                                                                   | Prevalence of psychiatric comorbidities in pediatric narcolepsy                                                         | Cross-sectional          | DAWBA interview.<br>PANSS                                                                                               | Sleep-related halluc: 20 (53%).<br>Daytime halluc (judged related to NT1): 3 (7.9%).<br>Met psychotic disorder criteria: 0 (0%) .                                                                                                                                                                                                                                                                                                                        |
| Dauvilliers, 2016 | NT1, N=542<br><i>Montpellier (France) (N=381); Barcelona (Spain) (N=161)</i>                                                           | n.a.                                                                                   | 1. Prevalence of psychosis<br>2. Presence of NMDA-receptor antibodies (blood, CSF) in sleep disorder biobank samples.   | Cross-sectional          | 1. Chart review, DSM-IV-TR interview if suspected psychotic comorbidity.<br>2. IgG antibodies (GluN1 subunit of NMDAR). | Comorbid psychotic disorder: 10 (1.8%).<br>Psychosis onset after narcolepsy: 9/10 (90%).<br>Psychosis onset after modafinil: 1/10 (10%).<br>Child/adolescent NT1 onset: 7/10 (70%) (vs. 35% child/adol onset in cases without psychotic disorder).<br>SCZ before age 18: 3/10 (30%).<br>Psychosis onset or worse after stimulants:- 5/10 (50%).<br>Anti-NMDA antibodies: 0/9 with psychotic disorder (7 tested in blood, 2 CSF), 0/25 without psychosis. |
| Sansa, 2016       | Chronic psychotic disorder, N=366 (297 SCZ, 69 SA).<br><i>Dept of Psychiatry, Sabadell (Spain).</i> 44.3±12 yr (all >18).              | n.a.                                                                                   | Prevalence of NT1 in patients with SCZ or SA                                                                            | Cross-sectional          | Sleep Q-aire; if + then ESS; if + then sleep consult & HLA. If ? NT1, then CSF Hcrt1.                                   | Narcolepsy suspected clinically: 24 patients (6.5%).<br>HLA DQB1*06:02 positive in 5/24.<br>Lumbar puncture accepted by 3, all with normal Hcrt-1.<br>NT1 diagnoses: 0.                                                                                                                                                                                                                                                                                  |
| Mayer, 2018       | NT1, N=670.<br><i>41 Sleep Centers in Europe</i><br>39.4 yr.                                                                           | n.a.                                                                                   | Side effects of SO                                                                                                      | Prospective              | Clinical follow-up during 72 weeks (visits or calls)                                                                    | "Agitation" reported in 2 cases (0.3%).<br>One case each reported: hallucinations, delusion, derealization, "mental disorder", psychotic disorder,                                                                                                                                                                                                                                                                                                       |

|                   |                                                                                                                   |      |                                                                           |                 |                           |                                                                                                                                                              |
|-------------------|-------------------------------------------------------------------------------------------------------------------|------|---------------------------------------------------------------------------|-----------------|---------------------------|--------------------------------------------------------------------------------------------------------------------------------------------------------------|
| Giannoccaro, 2017 | Narcolepsy, N=61 (50 NT1, 11 NT2; 20 were children). <i>Sleep Center (Bologna)</i> .                              | n.a. | Study of Hcrt-1 receptor antibodies. Reported N with psychotic disorders. | Cross-sectional | No psychiatric evaluation | Comorbid psychosis: 5/50 NT1 (10%); 0/11 NT2. Anti-Ncrt1-receptor Ab: 3/61 (4.9%). Of these, 1 also had                                                      |
| Drakatos, 2017    | Narcolepsy, N=90 <i>Sleep Disorder Center (London)</i> . 42.5±14.9 yr.                                            | n.a. | Side effects of SO                                                        | Retrospective   | Chart review              | Halluc: 2 (2.2%).<br>Psychosis: 3 (3.3%), associated with older age (r=0.234, p=0.027)                                                                       |
| Thakrar, 2018     | Central Hypersomnia, N=126 (70 NT1, 47 NT2, 9 Idiopathic). Current meds: modafinil 117; MPH 40; 16 amphetamines). | n.a. | Side effects under modafinil, MPH and/or amphetamines                     | Retrospective   | Chart review              | Symptoms considered treatment-related:<br>Halluc: none.<br>Psychosis: none in modafinil or MPH groups.<br>1 (6.2%) in amphetamine group, resolved after d/c. |

Abbreviations: BAI: Beck anxiety Inventory; BDI: Beck Depression Inventory; BPRS: Brief Psychiatric Rating Scale; CSF: cerebro-spinal fluid; DAWBA: Development and Well-Being Assessment; DES: Dissociative Experiences Scale; Halluc: hallucinations; Hcrt1: Hypocretin-1; HRSD: Hamilton Rating Scale for Depression; K-SADS-E: Schedule for Affective Disorder and Schizophrenia for school-aged children, adolescent version; MMPI: Minnesota Multiphasic Personality Inventory; MPH: methylphenidate; MSLT: Multiple Sleep Latency Test; NT1: Narcolepsy Type 1; NT2: Narcolepsy Type 2; OR: odds ratio; PANSS: Positive and Negative Syndrome Scale; PMRQ: Prospective and Retrospective Memory Questionnaire; PSG: Polysomnography; Q-aires: questionnaires; QOL: Quality of Life Scaoe; SA: Schizoaffective disorder; SADS: Schedule for Affective Disorders and Schizophrenia; SCAN2.1: Schedules for Clinical Assessment in Neuropsychiatry; SCL-90: Symptom Checklist 90; SCZ: Schizophrenia; SDQ: Sleep Disorders Questionnaire; SO: Sodium Oxybate; STAI: State-Trait Anxiety Inventory.
